# Supplementary material for: Gastric conditions control both the evolution of the organization of protein-stabilized emulsions and the kinetic of lipolysis during in vitro digestion
Source: Royal Society of Chemistry journal article supplement (doi:10.1039/c2fo30031a), 2012-01-01
Supplement: c2fo30031a.pdf [file c2fo30031a.pdf]

Supplementary files : Food & Function Kenmogne-Domguia et al (FO-ART-02-2012-030031)

Figure 5: Evolution of droplet size distribution of oil-water emulsion in gastric condition with pH adjusted at 2.5

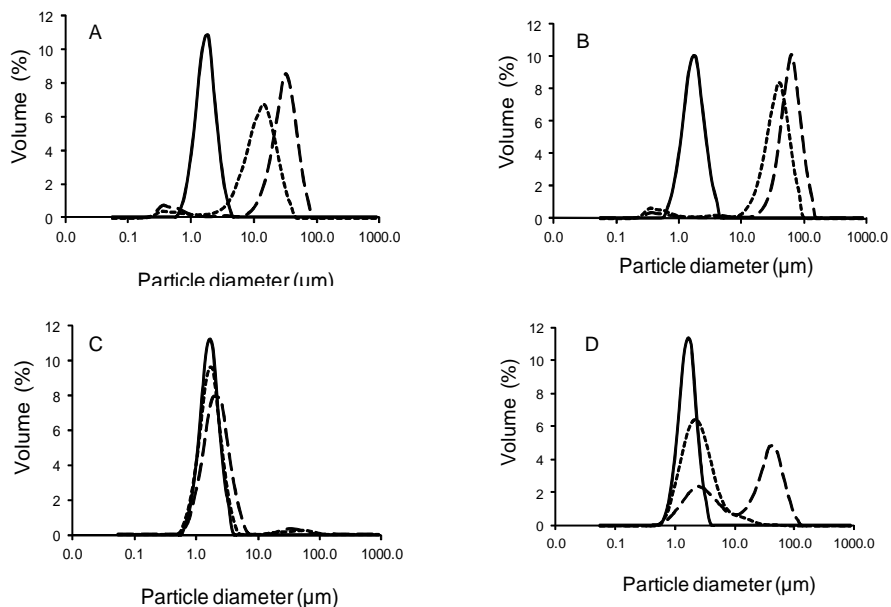

A without pepsin and SDS, B with pepsin without SDS, C without pepsin, with SDS, D with pepsin and SDS. Native emulsion (solid line), just after the addition of gastric juice (dotted line), and after 1 hour of incubation (dashed line)

Figure 6: Evolution of droplet size distribution of oil-water emulsion in gastric condition with pH adjusted at 4.0

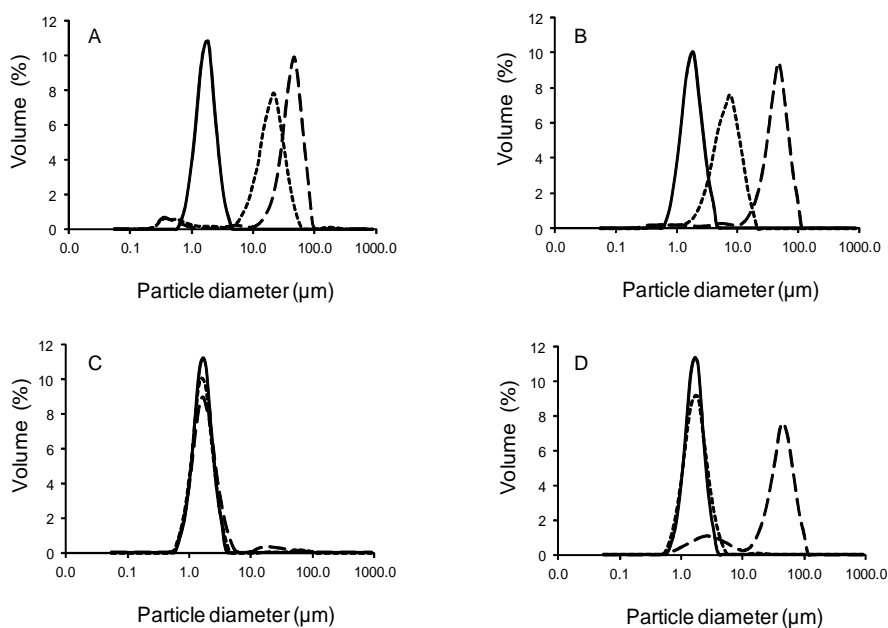

A without pepsin and SDS, B with pepsin without SDS, C without pepsin, with SDS, D with pepsin and SDS. Native emulsion (solid line), just after the addition of gastric juice (dotted line), and after 1 hour of incubation (dashed line)

Figure 7: Comparison of typical droplet size distribution of oil-water emulsion after 1 hour of incubation in gastric condition (solid line) and just after the addition of the intestinal simulated juice (dashed line)

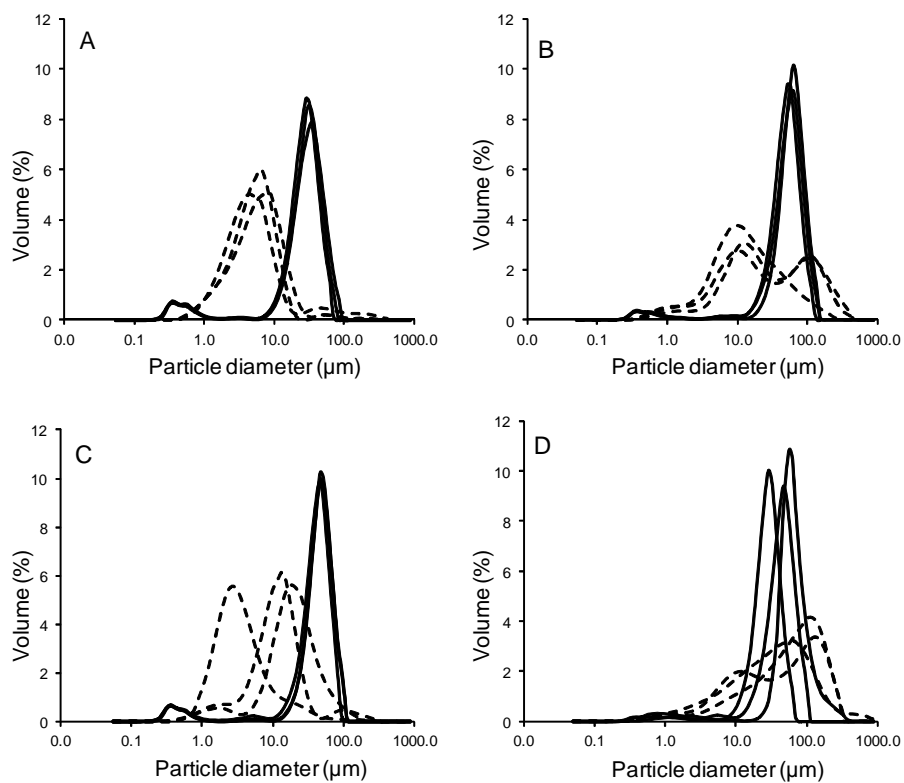

**A** without pepsin pH 2.5, **B** with pepsin pH 2.5  
**C** without pepsin pH 4.0, **D** with pepsin pH 4.0
